# Supplementary material for: The association between laminin and microglial morphology in vitro
Source: PubMed Central journal article supplement (PMC4917827; doi:10.1038/srep28580), 2016-06-23
Supplement: srep28580-s1.pdf [file srep28580-s1.pdf]

## Supplementary Information

### The association between laminin and microglial morphology *in vitro*

Wing Yip Tam<sup>1†</sup>, Ngan Pan Bennett Au<sup>1†</sup>, Chi Him Eddie Ma<sup>1,2,3</sup>

<sup>1</sup>Department of Biomedical Sciences, <sup>2</sup>Centre for Biosystems, Neuroscience, and Nanotechnology, <sup>3</sup>State Key Laboratory in Marine Pollution, City University of Hong Kong, Tat Chee Avenue, Hong Kong

† These authors contributed equally to this work.

Correspondence to: Dr. Chi Him Eddie Ma

<sup>1</sup>Department of Biomedical Sciences, <sup>2</sup>Centre for Biosystems, Neuroscience, and Nanotechnology, <sup>3</sup>State Key Laboratory in Marine Pollution, City University of Hong Kong, Tat Chee Avenue, Hong Kong

Email: [eddiema@cityu.edu.hk](mailto:eddiema@cityu.edu.hk)

Phone: (852)-3442-9328      Fax: (852)-3442-0549

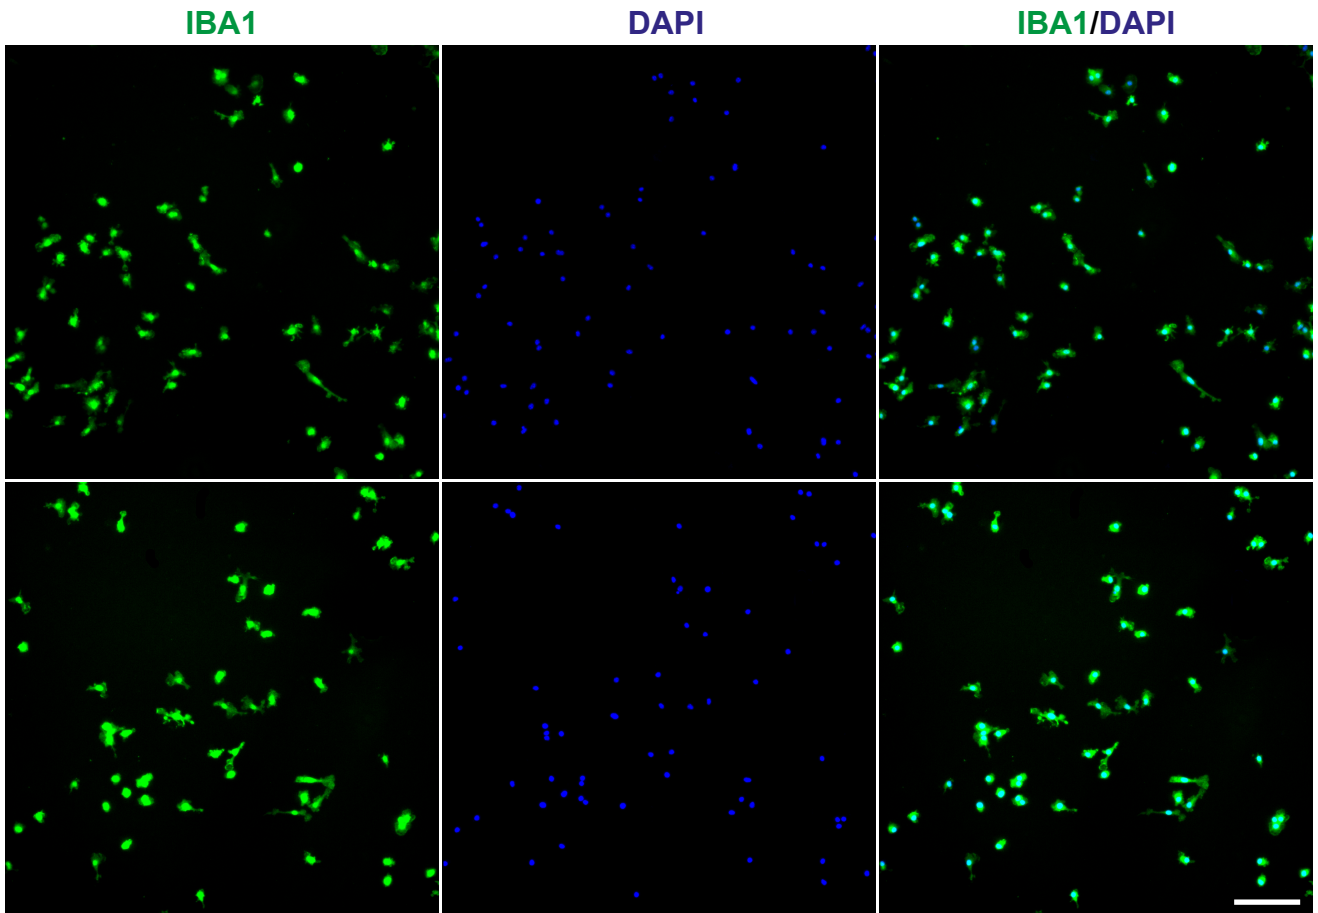

**Supplementary Figure S1 | Microglia culture is highly pure.** Representative fluorescence micrographs indicated that pure microglia culture could be obtained from the mixed primary cortical cultures, and the purity was 99% as determined by immunostaining using antibody against a classical microglial marker anti-IBA1 (as shown in green). DAPI was used for counterstaining of nuclei. Scale bar: 100  $\mu$ m.
